# Supplementary material for: Assessment of Prevalence and Diversity of Antimicrobial Resistant Escherichia coli from Retail Meats in Southern California
Source: MDPI journal article supplement (doi:10.3390/antibiotics12040782), 2023-04-19
Supplement: s1 [file antibiotics-2311357-supplementary.xlsx]

## Sheet: Table S1.
SRR	SRA	Biosample	NCVM	AMC_sign	AMC	AMP_sign	AMP	AZI_sign	AZI	FOX _sign	FOX	AXO_sign	AXO	CHL_sign	CHL	CIP_sign	CIP	GEN _sign	GEN	MER_sign	MER	NAL_sign	NAL	STR_sign	STR	FIS_sign	FIS	TET_sign	TET	COT_sign	COT	AMR_genes
SRR9002360	SRS4713979	SAMN11372830	N18EC0001	=	4	=	4	=	4	=	8	<=	0.25	=	16	<=	0.015	=	1	<=	0.06	=	2	=	16	<=	16	<=	4	<=	0.12	mdf(A)
NA	NA	NA	N18EC0002	=	2	<=	1	=	2	=	4	<=	0.25	=	4	<=	0.015	=	0.5	<=	0.06	=	2	=	4	<=	16	<=	4	<=	0.12
NA	NA	NA	N18EC0003	=	8	>	32	=	4	=	4	<=	0.25	=	4	<=	0.015	=	1	<=	0.06	=	2	=	8	<=	16	>	32	<=	0.12
SRR9002361	SRS4713978	SAMN11372831	N18EC0004	>	32	>	32	=	4	>	32	=	32	=	4	=	0.03	>	16	<=	0.06	=	2	>	64	<=	16	>	32	<=	0.12	aac(3)-IVa aph(3'')-Ib aph(4)-Ia aph(6)-Id blaCMY-2 blaTEM-1A mdf(A) tet(A) tet(B)
NA	NA	NA	N18EC0005	=	16	>	32	=	4	=	4	<=	0.25	=	4	<=	0.015	=	8	<=	0.06	=	2	>	64	<=	16	>	32	<=	0.12
SRR9002358	SRS4713981	SAMN11372832	N18EC0006	=	4	=	4	=	4	=	4	<=	0.25	=	8	<=	0.015	=	1	<=	0.06	=	2	=	4	<=	16	<=	4	<=	0.12	mdf(A)
NA	NA	NA	N18EC0007	=	4	=	2	=	8	=	2	<=	0.25	=	4	<=	0.015	=	1	<=	0.06	=	2	=	8	<=	16	<=	4	<=	0.12
NA	NA	NA	N18EC0069	=	4	=	4	=	1	=	4	<=	0.25	<=	2	<=	0.015	=	0.5	<=	0.06	=	2	=	8	=	32	>	32	<=	0.12
SRR9002374	SRS4713965	SAMN11372857	N18EC0070	=	2	=	2	=	2	=	8	<=	0.25	=	4	<=	0.015	=	0.5	<=	0.06	=	2	=	4	<=	16	<=	4	<=	0.12	mdf(A)
NA	NA	NA	N18EC0071	=	4	=	4	=	4	=	4	<=	0.25	=	8	=	0.12	=	1	<=	0.06	=	4	=	64	>	256	>	32	=	0.25
SRR9002369	SRS4713970	SAMN11372858	N18EC0072	=	16	>	32	=	8	=	4	<=	0.25	=	8	<=	0.015	=	1	<=	0.06	=	4	=	8	<=	16	>	32	<=	0.12	blaHERA-3 mdf(A) tet(A)
SRR9002368	SRS4713971	SAMN11372859	N18EC0074	=	4	=	2	=	4	=	4	<=	0.25	=	4	<=	0.015	=	0.5	<=	0.06	=	2	=	8	<=	16	<=	4	<=	0.12	mdf(A)
SRR9002384	SRS4713955	SAMN11372860	N18EC0076	=	4	=	4	=	4	=	4	<=	0.25	=	8	<=	0.015	>	16	<=	0.06	=	2	=	64	>	256	>	32	=	0.25	aac(3)-VIa ant(3'')-Ia mdf(A) sul1 tet(A)
NA	NA	NA	N18EC0169	=	4	=	2	=	4	=	2	<=	0.25	=	8	<=	0.015	=	0.5	<=	0.06	=	1	=	4	=	32	<=	4	<=	0.12
SRR9002304	SRS4714036	SAMN11372909	N18EC0170	=	4	>	32	=	2	=	4	<=	0.25	=	4	<=	0.015	>	16	<=	0.06	=	1	=	8	<=	16	=	32	<=	0.12	aac(3)-IId blaTEM-1B mdf(A) tet(A)
NA	NA	NA	N18EC0171	=	8	>	32	=	4	=	4	<=	0.25	=	8	<=	0.015	=	1	<=	0.06	=	2	=	16	<=	16	<=	4	<=	0.12
SRR9002392	SRS4713947	SAMN11372910	N18EC0172	=	2	=	2	=	4	=	2	<=	0.25	=	4	<=	0.015	=	0.5	<=	0.06	=	2	=	8	<=	16	=	32	<=	0.12	mdf(A) tet(A)
NA	NA	NA	N18EC0173	=	4	=	2	=	2	=	4	<=	0.25	=	8	<=	0.015	=	1	<=	0.06	=	1	=	8	<=	16	<=	4	<=	0.12
SRR9002391	SRS4713948	SAMN11372911	N18EC0174	=	16	>	32	=	4	=	4	<=	0.25	=	4	<=	0.015	=	0.5	<=	0.06	=	2	=	8	<=	16	<=	4	<=	0.12	blaHERA-3 mdf(A)
NA	NA	NA	N18EC0175	=	4	=	4	=	4	=	4	<=	0.25	=	4	<=	0.015	=	1	<=	0.06	=	1	=	8	<=	16	<=	4	<=	0.12
SRR9002400	SRS4713939	SAMN11372912	N18EC0176	=	4	>	32	=	4	=	2	<=	0.25	=	4	=	0.5	=	0.5	<=	0.06	=	8	=	64	<=	16	=	32	<=	0.12	aph(3'')-Ib aph(6)-Id blaTEM-1B mdf(A) qnrB19 tet(B)
SRR9984851	SRS5277969	SAMN12359629	N18EC0314	=	4	=	4	=	2	=	4	<=	0.25	=	8	<=	0.015	=	1	<=	0.06	=	2	=	8	<=	16	<=	4	<=	0.12	mdf(A)
NA	NA	NA	N18EC0315	=	2	<=	1	=	4	=	2	<=	0.25	=	8	<=	0.015	=	16	<=	0.06	=	2	=	32	<=	16	<=	4	<=	0.12
SRR9984850	SRS5277970	SAMN12359630	N18EC0316	=	2	<=	1	=	8	=	2	<=	0.25	=	8	<=	0.015	=	1	<=	0.06	=	2	=	8	<=	16	<=	4	<=	0.12	mdf(A)
NA	NA	NA	N18EC0317	=	4	=	2	=	4	=	8	<=	0.25	=	8	<=	0.015	=	1	<=	0.06	=	2	=	64	>	256	>	32	=	0.25
SRR9984849	SRS5277971	SAMN12359631	N18EC0318	=	4	=	2	=	2	=	4	<=	0.25	=	8	<=	0.015	=	1	<=	0.06	=	2	=	8	<=	16	<=	4	<=	0.12	mdf(A)
NA	NA	NA	N18EC0319	=	2	=	2	=	4	=	4	<=	0.25	=	4	<=	0.015	=	0.5	<=	0.06	=	2	=	4	<=	16	<=	4	<=	0.12
SRR9984935	SRS5277885	SAMN12359632	N18EC0320	=	2	<=	1	=	1	=	2	<=	0.25	=	4	<=	0.015	=	1	<=	0.06	=	1	=	8	<=	16	<=	4	<=	0.12	mdf(A)
SRR9984823	SRS5277997	SAMN12359680	N18EC0432	=	32	>	32	=	2	=	32	=	16	=	4	<=	0.015	>	16	<=	0.06	=	1	=	8	>	256	>	32	<=	0.12	aac(3)-VIa aac(6')-IIc blaCMY-2 blaSHV-187 blaTEM-1A ere(A) mcr-9 mdf(A) sul1 sul2 tet(A)
NA	NA	NA	N18EC0433	=	4	=	2	=	2	=	2	<=	0.25	=	4	<=	0.015	=	0.5	<=	0.06	=	2	=	8	<=	16	<=	4	<=	0.12
SRR9984824	SRS5277996	SAMN12359681	N18EC0434	=	2	=	2	=	4	=	4	<=	0.25	=	4	<=	0.015	=	1	<=	0.06	=	2	=	8	<=	16	<=	4	<=	0.12	mdf(A)
NA	NA	NA	N18EC0435	=	8	=	4	=	4	=	4	<=	0.25	=	8	<=	0.015	=	0.5	<=	0.06	=	2	=	8	<=	16	<=	4	<=	0.12
SRR9984827	SRS5277993	SAMN12359682	N18EC0436	=	8	>	32	=	1	=	4	<=	0.25	>	32	<=	0.015	=	0.5	<=	0.06	=	1	>	64	>	256	>	32	>	4	aph(3'')-Ib aph(6)-Id blaTEM-1B dfrA14 floR mdf(A) sul2 tet(A)
NA	NA	NA	N18EC0437	=	4	=	2	=	4	=	2	<=	0.25	=	8	<=	0.015	=	1	<=	0.06	=	1	=	32	<=	16	<=	4	<=	0.12
NA	NA	NA	N18EC0438	=	16	>	32	=	2	=	4	<=	0.25	=	4	=	0.25	=	0.5	<=	0.06	>	32	=	64	>	256	>	32	=	0.25
SRR9984944	SRS5277876	SAMN12359718	N18EC0540	=	4	=	2	=	4	=	4	<=	0.25	=	4	<=	0.015	=	0.5	<=	0.06	=	2	=	4	<=	16	<=	4	<=	0.12	mdf(A)
NA	NA	NA	N18EC0541	=	2	<=	1	=	4	=	2	<=	0.25	<=	2	<=	0.015	=	1	<=	0.06	=	1	=	8	<=	16	<=	4	<=	0.12
SRR9984945	SRS5277875	SAMN12359719	N18EC0542	=	8	>	32	=	8	=	4	<=	0.25	=	8	>	4	=	16	<=	0.06	>	32	=	32	>	256	>	32	<=	0.12	aac(3)-VIa ant(3'')-Ia blaHERA-3 mdf(A) sul1 tet(B), GyrA (D87N), GyrA (S83L)
NA	NA	NA	N18EC0543	=	2	=	2	=	4	=	2	<=	0.25	=	4	<=	0.015	=	0.5	<=	0.06	=	2	=	4	<=	16	<=	4	<=	0.12
SRR9984942	SRS5277878	SAMN12359720	N18EC0544	=	4	=	4	=	4	=	4	<=	0.25	=	8	<=	0.015	=	0.5	<=	0.06	=	2	=	4	>	256	>	32	=	0.25	aph(3'')-Ib aph(3')-Ia aph(6)-Id mdf(A) sul2 tet(B)
NA	NA	NA	N18EC0545	=	8	>	32	=	4	=	2	<=	0.25	=	8	<=	0.015	>	16	<=	0.06	=	2	=	8	>	256	>	32	<=	0.12
SRR9984943	SRS5277877	SAMN12359721	N18EC0546	=	4	=	4	=	4	=	4	<=	0.25	=	4	<=	0.015	=	1	<=	0.06	=	2	=	8	<=	16	<=	4	<=	0.12	mdf(A)
NA	NA	NA	N18EC0547	=	4	=	4	=	4	=	4	<=	0.25	=	4	<=	0.015	=	1	<=	0.06	=	2	=	4	<=	16	>	32	<=	0.12
SRR9984940	SRS5277880	SAMN12359722	N18EC0548	=	2	=	2	=	4	=	4	<=	0.25	=	4	<=	0.015	=	1	<=	0.06	=	1	=	8	<=	16	<=	4	<=	0.12	mdf(A)
SRR9984773	SRS5277618	SAMN12359771	N18EC0662	=	4	=	4	=	4	=	4	<=	0.25	=	4	<=	0.015	>	16	<=	0.06	=	2	=	32	>	256	>	32	<=	0.12	aac(3)-VIa ant(3'')-Ia mdf(A) sul1 tet(A)
NA	NA	NA	N18EC0663	=	2	=	2	=	4	=	4	<=	0.25	=	4	<=	0.015	=	16	<=	0.06	<=	0.5	=	32	>	256	<=	4	=	0.5
SRR9984776	SRS5277615	SAMN12359772	N18EC0664	=	4	=	2	=	8	=	4	<=	0.25	=	8	<=	0.015	=	0.5	<=	0.06	=	1	=	8	>	256	<=	4	=	0.25	mdf(A) sul2
NA	NA	NA	N18EC0665	=	2	=	2	=	4	=	2	<=	0.25	=	4	<=	0.015	=	0.5	<=	0.06	=	2	=	4	>	256	>	32	=	0.25
SRR9984775	SRS5277616	SAMN12359773	N18EC0666	=	4	=	2	=	4	=	4	<=	0.25	=	8	<=	0.015	=	0.5	<=	0.06	=	2	=	4	<=	16	>	32	<=	0.12	mdf(A) tet(B)
SRR9984611	SRS5277780	SAMN12359774	N18EC0667	=	4	=	2	=	8	=	2	<=	0.25	=	8	<=	0.015	=	1	<=	0.06	=	2	=	4	<=	16	>	32	<=	0.12	mdf(A) tet(A)
SRR9984612	SRS5277779	SAMN12359775	N18EC0668	=	8	>	32	=	2	=	8	<=	0.25	=	4	<=	0.015	=	0.5	<=	0.06	=	2	=	4	<=	16	>	32	<=	0.12	blaTEM-1B mdf(A) tet(A)
NA	NA	NA	N18EC0671	=	2	=	4	=	4	=	4	<=	0.25	=	8	<=	0.015	=	0.5	<=	0.06	=	2	=	4	>	256	<=	4	<=	0.12
NA	NA	NA	N18EC0777	=	4	=	4	=	4	=	8	<=	0.25	=	8	<=	0.015	=	0.5	<=	0.06	=	2	=	32	>	256	>	32	<=	0.12
SRR9984574	SRS5277817	SAMN12359825	N18EC0778	=	8	=	4	=	4	=	4	<=	0.25	=	4	<=	0.015	=	0.5	<=	0.06	=	2	=	4	<=	16	>	32	<=	0.12	mdf(A) tet(B) tet(C)
NA	NA	NA	N18EC0779	=	4	=	4	=	8	=	4	<=	0.25	=	8	<=	0.015	=	0.5	<=	0.06	=	2	=	16	<=	16	<=	4	<=	0.12
SRR9984571	SRS5277820	SAMN12359826	N18EC0780	=	2	=	2	=	8	=	4	<=	0.25	=	4	<=	0.015	=	1	<=	0.06	=	2	=	64	>	256	>	32	<=	0.12	aph(3'')-Ib aph(3')-Ia aph(6)-Id mdf(A) sul2 tet(B)
NA	NA	NA	N18EC0781	=	4	=	2	=	8	=	2	<=	0.25	=	8	<=	0.015	=	0.5	<=	0.06	=	2	=	16	<=	16	<=	4	<=	0.12
SRR9984572	SRS5277819	SAMN12359827	N18EC0782	=	4	=	2	=	4	=	4	<=	0.25	=	4	<=	0.015	=	0.5	<=	0.06	=	2	=	4	>	256	>	32	<=	0.12	mdf(A) sul2 tet(B)
NA	NA	NA	N18EC0783	=	4	=	4	=	2	=	4	<=	0.25	=	4	<=	0.015	=	1	<=	0.06	=	1	=	64	>	256	>	32	>	4
SRR9984569	SRS5277822	SAMN12359828	N18EC0784	=	8	>	32	=	2	=	2	<=	0.25	=	8	<=	0.015	=	16	<=	0.06	=	2	=	32	>	256	<=	4	<=	0.12	aac(3)-VIa ant(3'')-Ia blaHERA-3 mdf(A) sul1
NA	NA	NA	N18EC0785	=	4	=	2	=	4	=	2	<=	0.25	=	8	<=	0.015	=	0.5	<=	0.06	=	1	=	8	<=	16	<=	4	<=	0.12
SRR9984570	SRS5277821	SAMN12359829	N18EC0786	=	4	=	2	=	4	=	4	<=	0.25	=	4	<=	0.015	=	0.5	<=	0.06	=	2	=	4	<=	16	<=	4	<=	0.12	mdf(A)
NA	NA	NA	N18EC0787	=	4	=	2	=	4	=	4	<=	0.25	=	4	<=	0.015	=	1	<=	0.06	=	2	=	8	<=	16	<=	4	<=	0.12
NA	NA	NA	N18EC0871	=	4	=	4	=	2	=	8	<=	0.25	=	4	<=	0.015	>	16	<=	0.06	=	2	>	64	>	256	<=	4	<=	0.12
SRR9984720	SRS5277671	SAMN12359871	N18EC0872	=	4	=	2	=	4	=	2	<=	0.25	=	8	<=	0.015	=	1	<=	0.06	=	2	=	8	<=	16	<=	4	<=	0.12	mdf(A)
NA	NA	NA	N18EC0873	=	4	=	2	=	8	=	2	<=	0.25	=	8	<=	0.015	=	2	<=	0.06	=	2	=	16	<=	16	<=	4	<=	0.12
SRR9984709	SRS5277682	SAMN12359872	N18EC0874	=	2	=	2	=	2	=	2	<=	0.25	=	4	<=	0.015	>	16	<=	0.06	=	1	=	32	>	256	=	32	<=	0.12	aac(3)-VIa ant(3'')-Ia mdf(A) sul1 tet(A)
NA	NA	NA	N18EC0875	=	8	=	4	=	8	=	4	<=	0.25	=	8	<=	0.015	=	16	<=	0.06	=	2	=	32	>	256	>	32	=	0.25
SRR9984938	SRS5277882	SAMN12359873	N18EC0876	=	2	=	2	=	4	=	4	<=	0.25	=	4	<=	0.015	=	1	<=	0.06	=	2	=	8	<=	16	<=	4	<=	0.12	mdf(A)
NA	NA	NA	N18EC0877	=	4	=	4	=	4	=	4	<=	0.25	=	8	<=	0.015	=	2	<=	0.06	=	2	=	4	=	32	<=	4	<=	0.12
NA	NA	NA	N18EC1029	=	2	=	2	=	8	=	4	<=	0.25	=	8	<=	0.015	=	1	<=	0.06	=	2	=	8	<=	16	=	8	<=	0.12
SRR9984847	SRS5277973	SAMN12359942	N18EC1030	=	4	=	2	=	4	=	2	<=	0.25	=	4	<=	0.015	=	1	<=	0.06	=	2	=	8	<=	16	>	32	<=	0.12	mdf(A) tet(A)
NA	NA	NA	N18EC1031	=	4	=	4	=	4	=	4	<=	0.25	=	4	<=	0.015	=	16	<=	0.06	=	2	=	32	>	256	<=	4	<=	0.12
SRR9996268	SRS5286581	SAMN12587175	N18EC1032	=	4	=	2	=	4	=	4	<=	0.25	=	8	<=	0.015	=	1	<=	0.06	=	2	=	8	<=	16	<=	4	<=	0.12	mdf(A)
NA	NA	NA	N18EC1033	=	4	=	2	=	8	=	4	<=	0.25	<=	2	<=	0.015	=	0.5	<=	0.06	=	2	=	4	<=	16	<=	4	<=	0.12
NA	NA	NA	N18EC1034	=	2	=	2	=	8	=	4	<=	0.25	=	8	<=	0.015	=	1	<=	0.06	=	2	=	8	<=	16	<=	4	<=	0.12
NA	NA	NA	N18EC1035	=	16	>	32	=	4	=	4	<=	0.25	=	8	<=	0.015	=	0.5	<=	0.06	=	2	=	32	>	256	>	32	=	0.5
SRR9984848	SRS5277972	SAMN12359943	N18EC1036	=	2	=	2	=	4	=	4	<=	0.25	=	8	<=	0.015	=	1	<=	0.06	=	1	=	8	=	32	<=	4	<=	0.12	mdf(A)
NA	NA	NA	N18EC1037	=	8	>	32	=	2	=	4	<=	0.25	=	8	<=	0.015	>	16	<=	0.06	=	2	>	64	>	256	>	32	=	0.25
SRR9984538	SRS5277853	SAMN12359944	N18EC1038	=	4	=	4	=	8	=	4	<=	0.25	=	8	<=	0.015	=	1	<=	0.06	=	2	=	8	<=	16	<=	4	<=	0.12	mdf(A)
NA	NA	NA	N18EC1039	=	4	=	4	=	4	=	4	<=	0.25	=	8	<=	0.015	=	1	<=	0.06	=	2	=	8	<=	16	<=	4	<=	0.12
SRR9984537	SRS5277854	SAMN12359945	N18EC1040	=	2	<=	1	=	2	=	4	<=	0.25	=	4	<=	0.015	=	0.5	<=	0.06	=	1	=	4	=	32	<=	4	<=	0.12	mdf(A)
NA	NA	NA	N18EC1041	=	4	=	2	=	4	=	4	<=	0.25	=	4	<=	0.015	=	1	<=	0.06	=	2	=	8	<=	16	<=	4	<=	0.12
SRR9984861	SRS5277959	SAMN12359946	N18EC1042	=	8	=	8	=	4	=	8	<=	0.25	=	8	<=	0.015	=	0.5	<=	0.06	=	4	=	32	<=	16	>	32	<=	0.12	aph(3'')-Ib aph(6)-Id mdf(A) tet(B)
NA	NA	NA	N18EC1043	=	8	=	8	=	4	=	8	<=	0.25	=	8	<=	0.015	=	1	<=	0.06	=	2	=	32	<=	16	>	32	<=	0.12
SRR9984596	SRS5277795	SAMN12360031	N18EC1232	=	2	=	2	=	4	=	4	<=	0.25	=	4	<=	0.015	=	1	<=	0.06	=	2	=	8	<=	16	<=	4	<=	0.12	mdf(A)
NA	NA	NA	N18EC1233	=	4	=	4	=	4	=	4	<=	0.25	=	4	<=	0.015	=	0.5	<=	0.06	=	4	>	64	<=	16	>	32	<=	0.12
SRR9984810	SRS5277581	SAMN12360032	N18EC1234	=	4	=	2	=	2	=	4	<=	0.25	=	4	<=	0.015	=	2	<=	0.06	=	2	=	8	<=	16	<=	4	<=	0.12	mdf(A)
NA	NA	NA	N18EC1235	=	4	=	2	=	4	=	2	<=	0.25	=	8	<=	0.015	=	0.5	<=	0.06	=	2	=	4	<=	16	<=	4	<=	0.12
SRR9984811	SRS5277580	SAMN12360033	N18EC1236	=	32	=	32	=	2	=	16	<=	0.25	=	8	<=	0.015	=	1	<=	0.06	=	2	>	64	>	256	>	32	<=	0.12	aph(3'')-Ib aph(3')-Ia aph(6)-Id mdf(A) sul2 tet(B)
NA	NA	NA	N18EC1237	=	8	=	4	=	8	=	8	<=	0.25	=	8	<=	0.015	=	1	<=	0.06	=	2	=	8	<=	16	<=	4	<=	0.12
SRR9984527	SRS5277864	SAMN12360034	N18EC1238	=	4	=	2	=	4	=	4	<=	0.25	=	4	<=	0.015	>	16	<=	0.06	=	2	=	64	>	256	>	32	<=	0.12	aac(3)-VIa ant(3'')-Ia mdf(A) sul1 tet(A)
NA	NA	NA	N18EC1239	=	16	>	32	=	4	=	8	<=	0.25	=	4	<=	0.015	=	1	<=	0.06	=	4	=	16	<=	16	>	32	<=	0.12
SRR9984526	SRS5277865	SAMN12360035	N18EC1240	=	16	>	32	=	8	=	8	<=	0.25	=	8	<=	0.015	>	16	<=	0.06	=	4	>	64	>	256	>	32	=	0.25	aac(3)-VIa ant(3'')-Ia mdf(A) sul1 sul2 tet(B)
NA	NA	NA	N18EC1241	=	4	=	4	=	4	=	4	<=	0.25	=	8	<=	0.015	=	1	<=	0.06	=	4	=	8	<=	16	>	32	<=	0.12
SRR9996266	SRS5286583	SAMN12587177	N18EC1242	=	8	>	32	=	8	=	4	<=	0.25	>	32	<=	0.015	=	1	<=	0.06	=	2	>	64	>	256	>	32	<=	0.12	blaTEM-1B mdf(A) sul2 tet(A) tet(B)
NA	NA	NA	N18EC1243	=	4	=	4	=	4	=	4	<=	0.25	=	8	<=	0.015	=	1	<=	0.06	=	2	=	8	>	256	>	32	<=	0.12
SRR9984529	SRS5277862	SAMN12360036	N18EC1244	=	2	=	2	=	4	=	4	<=	0.25	=	4	<=	0.015	=	1	<=	0.06	=	2	>	64	<=	16	>	32	<=	0.12	aph(3'')-Ib aph(6)-Id mdf(A) tet(A)
NA	NA	NA	N18EC1245	=	4	=	2	=	2	=	4	<=	0.25	<=	2	<=	0.015	=	8	<=	0.06	=	2	>	64	<=	16	>	32	<=	0.12
SRR9984528	SRS5277863	SAMN12360037	N18EC1246	=	4	=	2	=	4	=	4	<=	0.25	=	8	<=	0.015	=	0.5	<=	0.06	=	2	=	8	<=	16	<=	4	<=	0.12	mdf(A)
NA	NA	NA	N18EC1247	=	2	=	2	=	4	=	4	<=	0.25	=	8	<=	0.015	=	0.5	<=	0.06	=	2	=	8	<=	16	<=	4	<=	0.12
SRR9984523	SRS5277868	SAMN12360038	N18EC1248	=	4	=	2	=	2	=	4	<=	0.25	=	4	<=	0.015	=	0.5	<=	0.06	=	2	=	4	<=	16	<=	4	<=	0.12	mdf(A)
NA	NA	NA	N18EC1249	=	8	>	32	=	4	=	4	<=	0.25	=	4	<=	0.015	=	1	<=	0.06	=	2	=	8	<=	16	>	32	<=	0.12
SRR9984522	SRS5277869	SAMN12360039	N18EC1250	=	4	=	4	=	4	=	4	<=	0.25	=	8	<=	0.015	=	1	<=	0.06	=	4	=	8	<=	16	<=	4	<=	0.12	mdf(A)
NA	NA	NA	N18EC1251	=	2	=	2	=	4	=	2	<=	0.25	=	4	<=	0.015	=	1	<=	0.06	=	2	=	8	<=	16	<=	4	<=	0.12

## Sheet: Table S2.
Supplementary Table S2. Breakpoints used to classify minimum inhibitory concentrations of E.coli isolates. For ciprofloxacin, the breakpoint listed under the intermediate category corresponds to the breakpoint for decreased susceptibility (DSC).
Drug Class	Antimicrobial drug (abbreviation)	Range (ug/uL)	Susceptible	Intermediate	Resistant	Breakpoint Criteria
beta-lactam	Cefoxitin (FOX)	0.5 - 32	≤ 8	16	≥ 32	CLSI
macrolide	Azithromycin (AZI)	0.12 - 16	≤ 16	N/A	≥ 32	NARMS
chloramphenicol	Chloramphenicol (CHL)	2 - 32	≤ 8	16	≥ 32	CLSI
tetracycline	Tetracycline (TET)	4 - 32	≤ 4	8	≥ 16	CLSI
beta-lactam	Ceftriaxone (AXO)	0.25 - 64	≤ 1	2	≥ 4	CLSI
beta-lactam	Amoxicillin/clavulanic acid (AMC)	1/0.5 - 32/16	≤ 8 / 4	16/8	≥ 32/16	CLSI
quinolone	Ciprofloxacin (CIP)	0.015 - 4	≤ 0.06	≥ 0.12 (DSC)	≥ 1	CLSI
aminoglycoside	Gentamicin (GEN)	0.25 - 16	≤ 4	8	≥ 16	CLSI
quinolone	Nalidixic acid (NAL)	0.5 - 32	≤ 16	N/A	≥ 32	CLSI
sulfonamide	Sulfisoxazole (FIS)	16 - 256	≤ 256	N/A	≥ 512	CLSI
sulfonamide	Trimethroprim-sulfamethoxazole (COT)	0.12/2.38 - 4/76	≤ 2 / 38	N/A	≥ 4 / 76	CLSI
beta-lactam	Ampicillin (AMP)	1 - 32	≤ 8	16	≥ 32	CLSI
aminoglycoside	Streptomycin (STR)	2 - 64	≤ 16	N/A	≥ 32	NARMS
Oenems	Meropenem (MER)	0.06-5	≤ 1	2	≥ 4	CLSI

## Sheet: Table S3.
Supplementary Table S3. Genotypic prediction of phenotypic resistance in E.coli isolates from retail meat (n=52)
CLSI class	Antimicrobial agent (abbreviation)	Phenotype: susceptible (number of isolates)		Phenotype: resistant (number of isolates)		Sensitivityb (%)	Specificityc (%)
		Genotype: resistant (FP)a	Genotype: susceptible (TN)a	Genotype: resistant (TP)a	Genotype: susceptible (FN)a
Aminoglycosides	Streptomycin (STR)	1	36	14	1	93.33	97.3
	Gentamicin (GEN)	0	42	10	0	100	100
Beta-lactam combination agents	Amoxicillin/clavulanic acid (AMC)	0	49	2	1	66.67	100
Cephems	Cefoxitin (FOX)	0	50	2	0	100	100
	Ceftriaxone (AXO)	0	50	2	0	100	100
Folate pathway antagonists	Sulfisoxazole (FIS)*	0	37	N/A	N/A	N/A	100
	Trimethroprim-sulfamethoxazole (COT)	0	51	1	0	100	100
Macrolides	Azithromycin (AZI)	0	52	N/A	N/A	N/A	100
Penems	Meropenem (MER)	0	52	N/A	N/A	N/A	100
Penicillins	Ampicillin (AMP)	0	39	11	2	84.62	100
Phenicols	Chloramphenicol (CHL)	0	50	1	1	50	100
Quinolones	Nalidixic acid (NAL)	0	51	1	0	100	100
	Ciprofloxacin (CIP)	0	51	1	0	100	100
Tetracycline	Tetracycline (TET)	0	27	25	0	100	100
Overall		1	637	70	5	93.33	99.84
aFP = False positive, TN = true negative, TP = true positive, FN = false negative bSensitivity was calculated as TP/(TP+FN) cSpecificity was calculated as TN/(TN+FP) *Inadequate range on drug dilution panel to determine resistance
